# Supplementary material for: One-pot synthesis of α,β-unsaturated ketones through sequential alkyne dimerization/hydration reactions using the Hoveyda–Grubbs catalyst
Source: Royal Society of Chemistry journal article supplement (doi:10.1039/d1nj02410h), 2021-01-01
Supplement: d1nj02410h1.pdf [file d1nj02410h1.pdf]

## One-pot Synthesis of $\alpha,\beta$ -Unsaturated Ketones through Sequential Alkyne Dimerization/Hydration Reactions using Hoveyda-Grubbs Catalyst

Bengi Özgün Öztürk,<sup>\*a</sup> Begüm Sarıaslan<sup>a,b</sup>, Mina Aşkun<sup>a</sup>, Zeynep Tunalı<sup>a</sup> and Solmaz Karabulut Şehitoğlu<sup>\*a</sup>

*Hacettepe University, Faculty of Science, Chemistry Department, 06800, Beytepe-Ankara, TURKEY*

### SUPPORTING INFORMATION

#### Spectral data for (Z)-but-1-en-3-yne-1,4-diylidibenzene (2a)

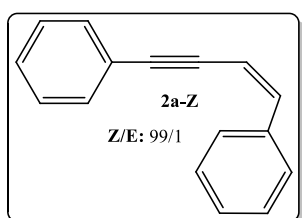

<sup>1</sup>H NMR (400 MHz, CDCl<sub>3</sub>)  $\delta$  7.94 (d,  $J$  = 7.5 Hz, 2H), 7.50 (d,  $J$  = 4.7 Hz, 2H), 7.39 – 7.25 (m, 6H + CHCl<sub>3</sub>), 6.70 (d,  $J$  = 11.9 Hz, 1H), 5.93 (d,  $J$  = 11.9 Hz, 1H); <sup>13</sup>C NMR (100 MHz, CDCl<sub>3</sub>)  $\delta$  138.58, 136.33, 131.50, 128.81, 123.17, 107.43, 95.90, 87.93; MS (EI):  $m/z$  204 [M]<sup>+</sup>

#### Spectral data for (Z)-4,4'-(but-1-en-3-yne-1,4-diyl)bis(methylbenzene) (2b)

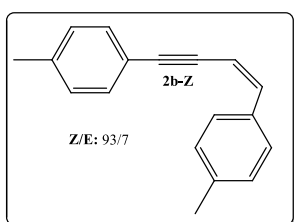

<sup>1</sup>H NMR (400 MHz, CDCl<sub>3</sub>)  $\delta$  7.84 (d,  $J$  = 7.6 Hz, 2H), 7.38-7.30 (m, 2H), 7.15-7.00 (m, 4H), 6.32 (d,  $J$  = 11.6 Hz, 1H), 5.85 (d,  $J$  = 11.6 Hz, 1H); <sup>13</sup>C NMR (100 MHz, CDCl<sub>3</sub>)  $\delta$  140.94, 138.53, 134.02, 131.38, 129.62, 128.77, 127.19, 120.58, 106.89, 106.39, 95.84, 91.92, 88.50, 88.00, 21.49, 21.01; MS (EI):  $m/z$  232 [M]<sup>+</sup>

### Spectral data for (Z)-2,2'-(but-1-en-3-yne-1,4-diyl)bis(methylbenzene) (2c)

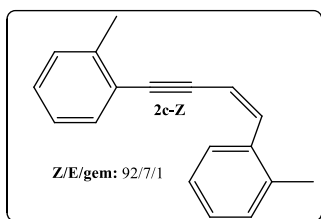

$^1\text{H}$  NMR (400 MHz,  $\text{CDCl}_3$ )  $\delta$  8.57 (m, 1H), 7.75-7.66 (m, 2H), 7.41-7.15 (m, 5H +  $\text{CHCl}_3$ ), 7.14 (d,  $J=11.6$  Hz, 1H, Z-isomer), 6.63 (d,  $J=16.2$  Hz, 1H, E-isomer), 6.26 (d,  $J=11.6$  Hz, 1H, Z-isomer), 2.76 (s), 2.67 (s), 2.62 (s), 2.58 (s);  $^{13}\text{C}$  NMR (100 MHz,  $\text{CDCl}_3$ )  $\delta$  (Z-isomer) 140.22, 136.55, 132.13, 130.15, 129.51, 128.34, 125.58, 108.58, 94.02, 91.68, 20.88, 19.88; MS (EI):  $m/z$  232  $[\text{M}]^+$

### Spectral data for (Z)-4,4'-(but-1-en-3-yne-1,4-diyl)bis(tert-butylbenzene) (2d)

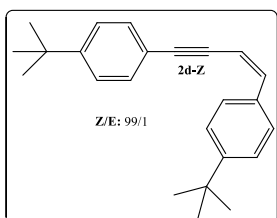

$^1\text{H}$  NMR (400 MHz,  $\text{CDCl}_3$ )  $\delta$  7.77 (d,  $J=8.3$  Hz, 2H), 7.38-7.20 (m, 6H +  $\text{CHCl}_3$ ), 6.51 (d,  $J=11.6$  Hz, 1H), 5.72 (d,  $J=11.6$  Hz, 1H), 1.21 (s, 18H);  $^{13}\text{C}$  NMR (100 MHz,  $\text{CDCl}_3$ )  $\delta$  131.38, 129.62, 128.77, 127.19, 120.58, 106.89, 106.39, 95.84, 91.92, 88.50, 88.00, 21.49, 21.01; MS (EI):  $m/z$  316  $[\text{M}]^+$

### Spectral data for (E)-1,4-diphenylbut-3-en-2-one

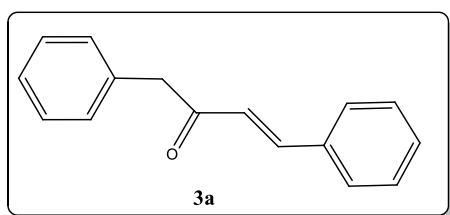

$^1\text{H}$  NMR (400 MHz,  $\text{CDCl}_3$ )  $\delta$  7.52 (d,  $J=16.2$  Hz, 1H), 7.38 (m, 2H), 7.25-7.15 (m, 8H), 6.67 (d,  $J=16.2$  Hz, 1H), 3.83 (s, 2H);  $^{13}\text{C}$  NMR (100 MHz,  $\text{CDCl}_3$ )  $\delta$  197.61, 143.64, 134.56, 130.70, 129.72, 129.12, 127.92, 127.21, 125.72, 48.52; MS (EI):  $m/z$  222  $[\text{M}]^+$

### Spectral data for (E)-1,4-di-p-tolylbut-3-en-2-one

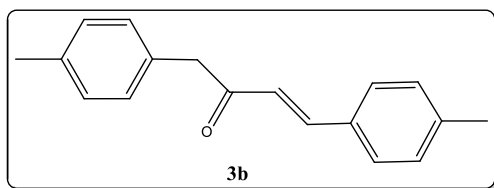

$^1\text{H}$  NMR (400 MHz,  $\text{CDCl}_3$ )  $\delta$  7.52 (d,  $J=16.2$  Hz, 1H), 7.33 (d,  $J=7.8$  Hz, 2H), 7.25-7.06 (m, 6H), 6.64 (d,  $J=16.2$  Hz, 1H), 3.80 (s, 2H), 2.27 (s, 3H) 2.24 (s, 3H);  $^{13}\text{C}$  NMR (100 MHz,  $\text{CDCl}_3$ )  $\delta$  196.92, 142.61, 140.31, 135.58, 128.68, 138.30, 123.17, 47.09, 20.25; MS (EI):  $m/z$  250  $[\text{M}]^+$

### Spectral data for (E)-1,4-di-o-tolylbut-3-en-2-one (3c)

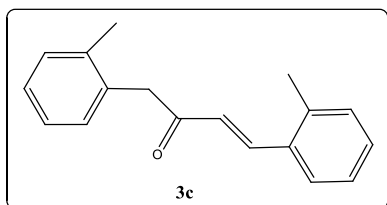

$^1\text{H}$  NMR (400 MHz,  $\text{CDCl}_3$ )  $\delta$  7.86 (d,  $J=15.9$  Hz, 1H), 7.43 (d,  $J=7.8$  Hz, 1H), 7.34-6.98 (m, 7H +  $\text{CHCl}_3$ ), 6.63 (d,  $J=16.0$  Hz, 1H), 3.87 (s, 2H), 2.33 (s, 3H), 2.22 (s, 3H);  $^{13}\text{C}$  NMR (100 MHz,  $\text{CDCl}_3$ )  $\delta$  197.32, 140.60, 130.82, 130.00, 128.87, 126.88, 126.02, 125.12, 47.22, 19.74; MS (EI):  $m/z$  250  $[\text{M}]^+$

### Spectral data for (E)-1,4-bis(4-(tert-butyl)phenyl)but-3-en-2-one

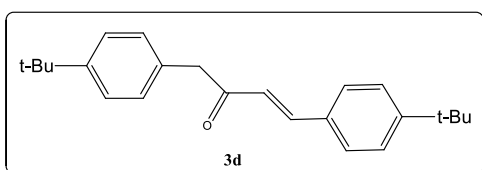

$^1\text{H}$  NMR (400 MHz,  $\text{CDCl}_3$ )  $\delta$  7.58 (d,  $J=16.1$  Hz, 1H), 7.42 (d,  $J=7.8$  Hz, 2H), 7.25-7.15 (m, 6H), 6.73 (d,  $J=16.1$  Hz, 1H), 3.89 (s, 2H), 1.26 (s, 18 H);  $^{13}\text{C}$  NMR (100 MHz,  $\text{CDCl}_3$ )  $\delta$  197.98, 143.27, 141.19, 136.70, 129.67, 129.43, 128.41, 124.28, 47.76, 36.82, 29.73, MS (EI):  $m/z$  334  $[\text{M}]^+$

MA-42

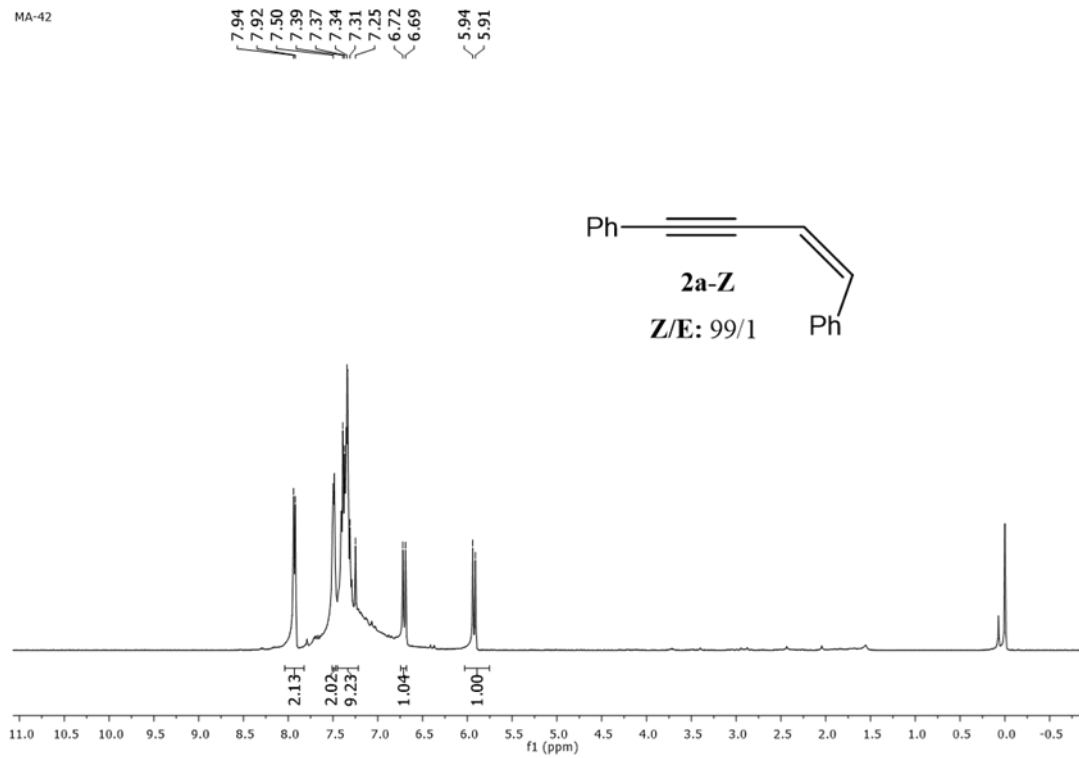

**Figure S1.**  $^1\text{H}$  NMR spectrum of **2a** (400 MHz,  $\text{CDCl}_3$ ) (Table 3, Entry 4)

MA-42

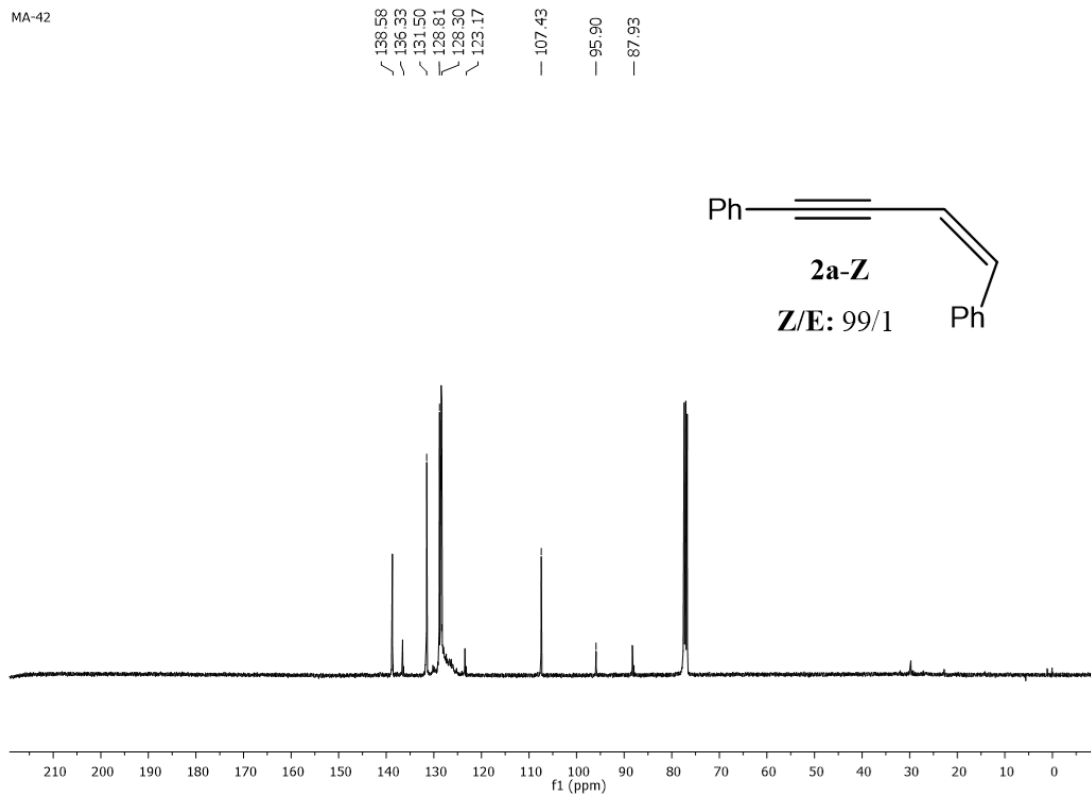

**Figure S2.**  $^{13}\text{C}$  NMR spectrum of **2a** (100 MHz,  $\text{CDCl}_3$ ) (Table 3, Entry 4)

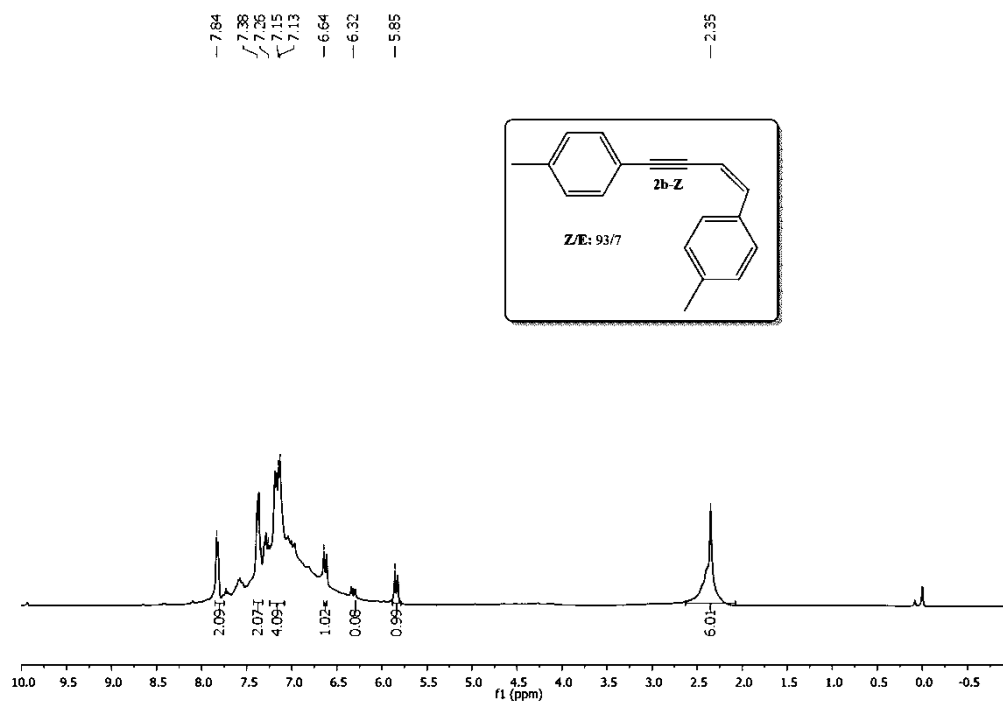

**Figure S3.**  $^1\text{H NMR}$  spectrum of **2b** (400 MHz,  $\text{CDCl}_3$ ) (Table 3, Entry 8)

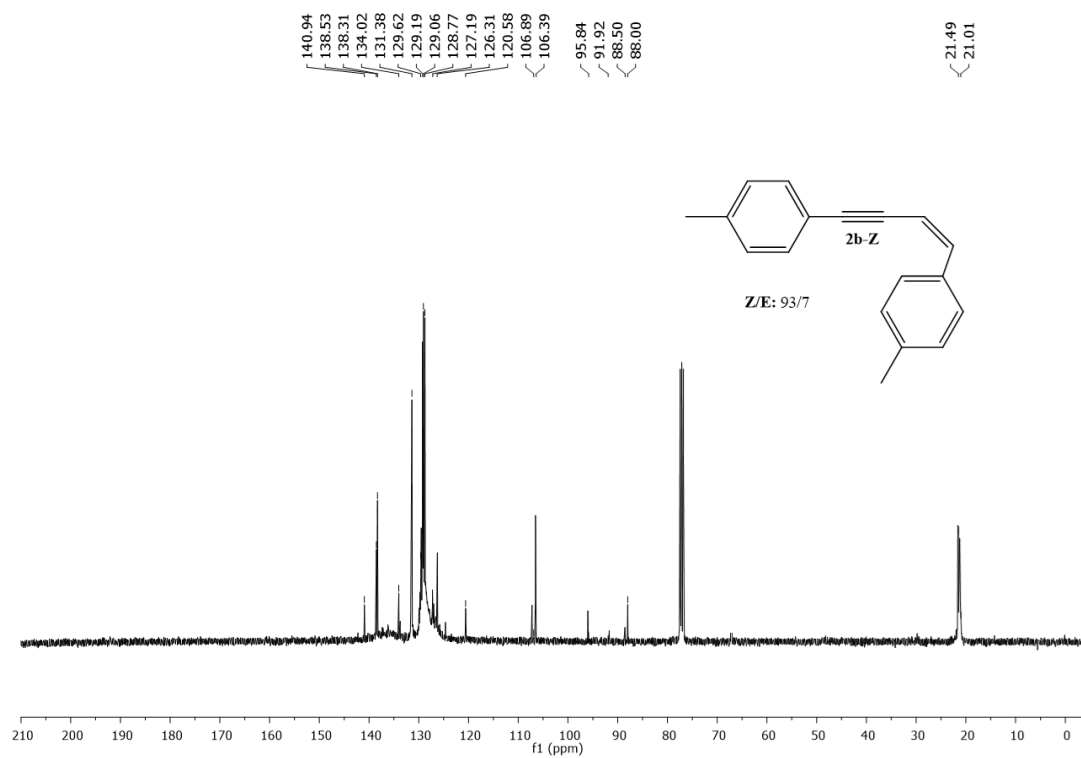

**Figure S4.**  $^{13}\text{C NMR}$  spectrum of **2b** (100 MHz,  $\text{CDCl}_3$ ) (Table 3, Entry 8)

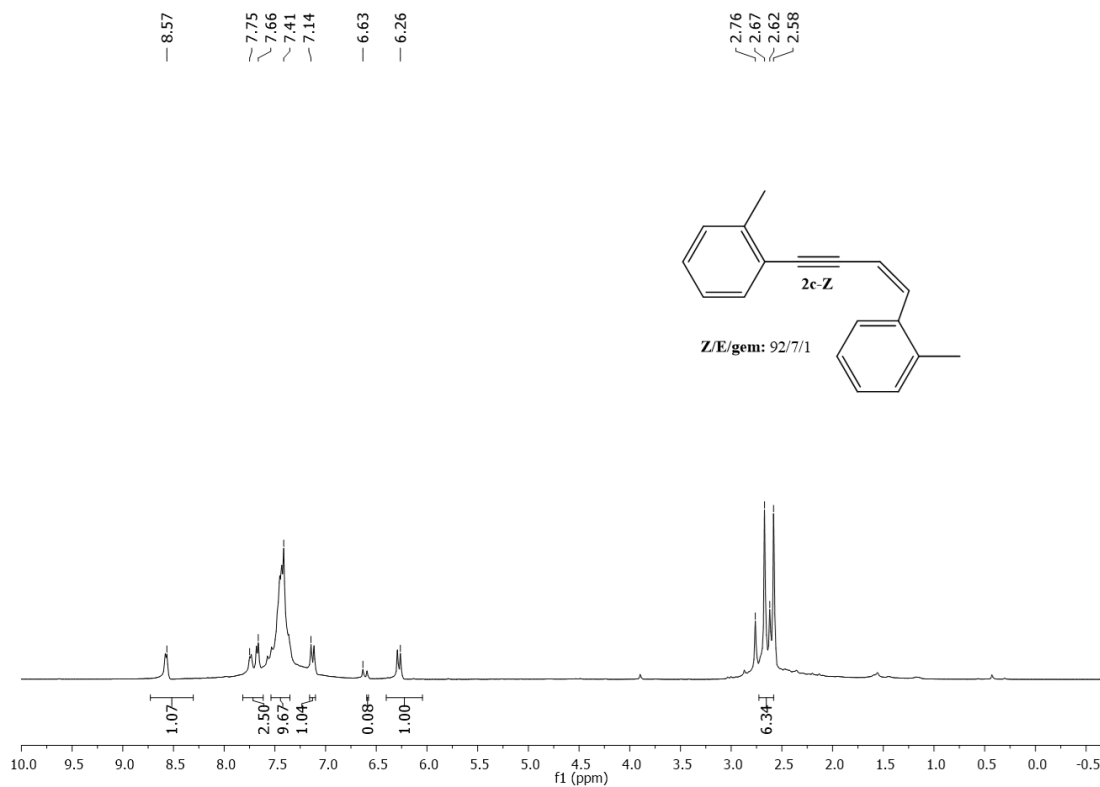

**Figure S5.**  $^1\text{H}$  NMR spectrum of **2c** (400 MHz,  $\text{CDCl}_3$ ) (Table 3, Entry 11)

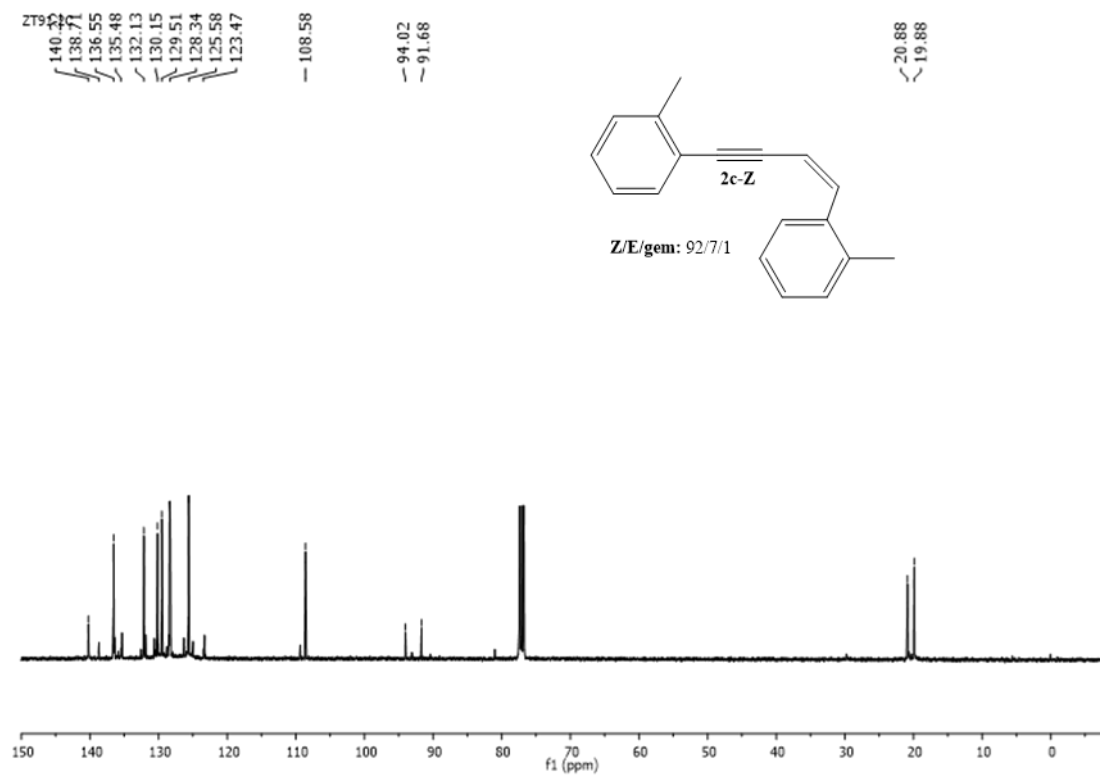

**Figure S6.**  $^{13}\text{C}$  NMR spectrum of **2c** (100 MHz,  $\text{CDCl}_3$ ) (Table 3, Entry 11)

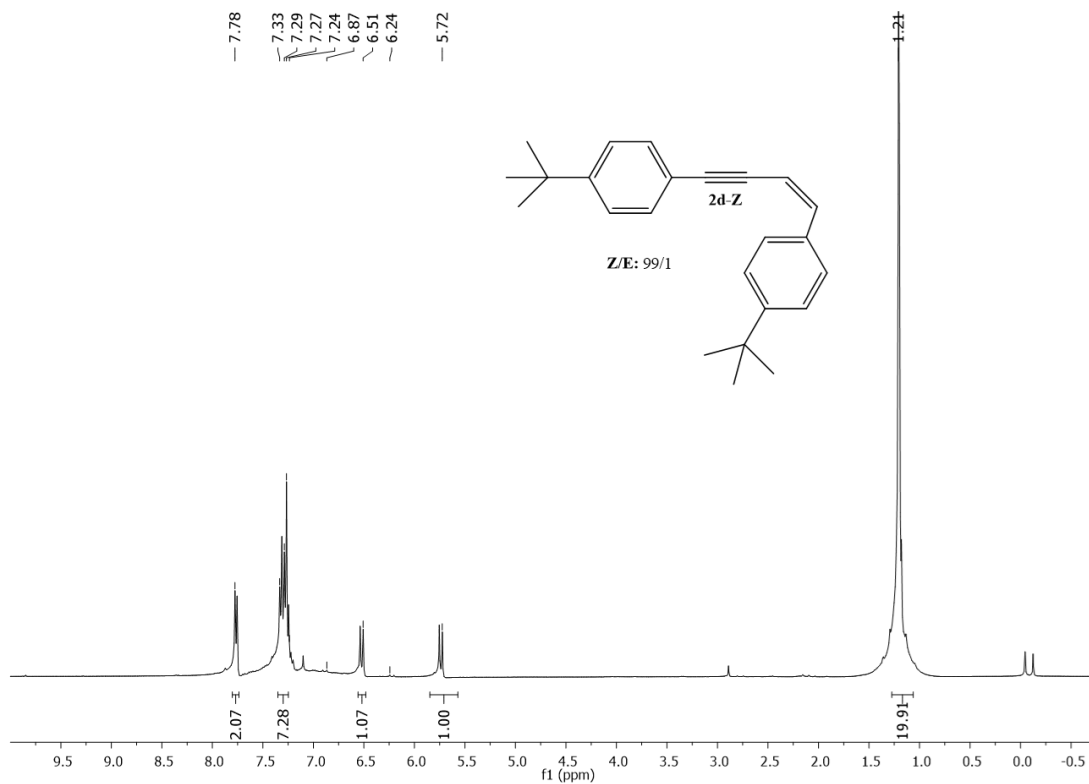

**Figure S7.**  $^1\text{H}$  NMR spectrum of 2d (400 MHz,  $\text{CDCl}_3$ ) (Table 3, Entry 14)

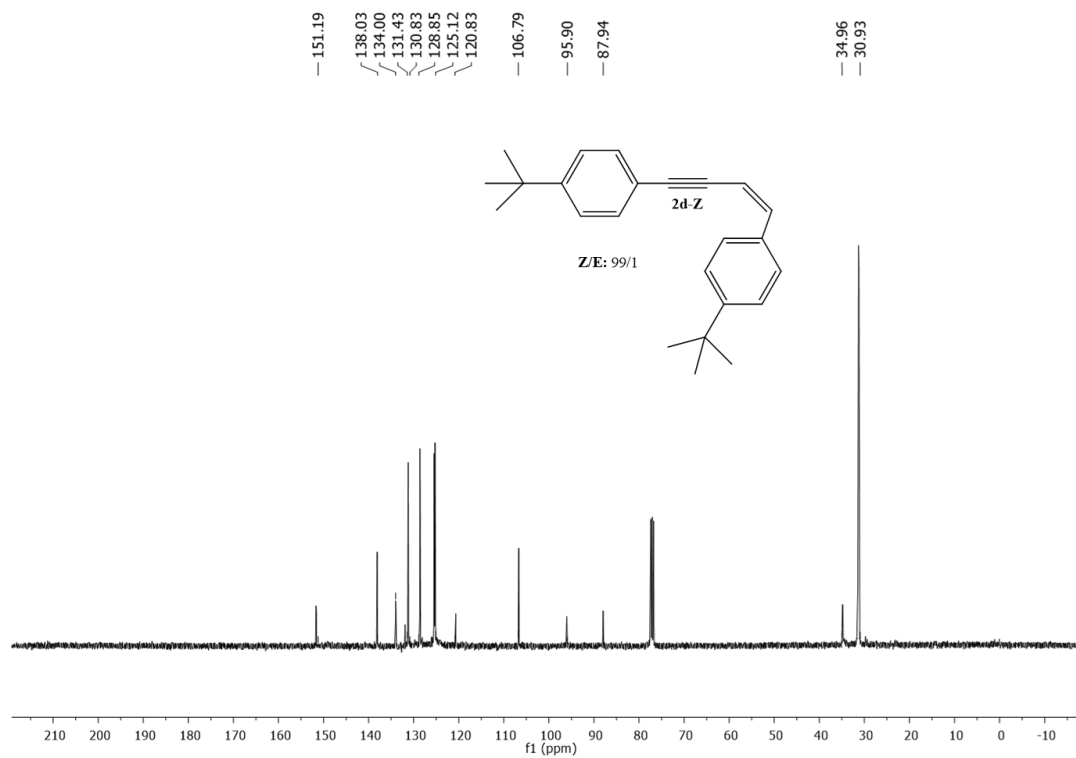

**Figure S8.**  $^{13}\text{C}$  NMR spectrum of 2d (100 MHz,  $\text{CDCl}_3$ ) (Table 3, Entry 14)

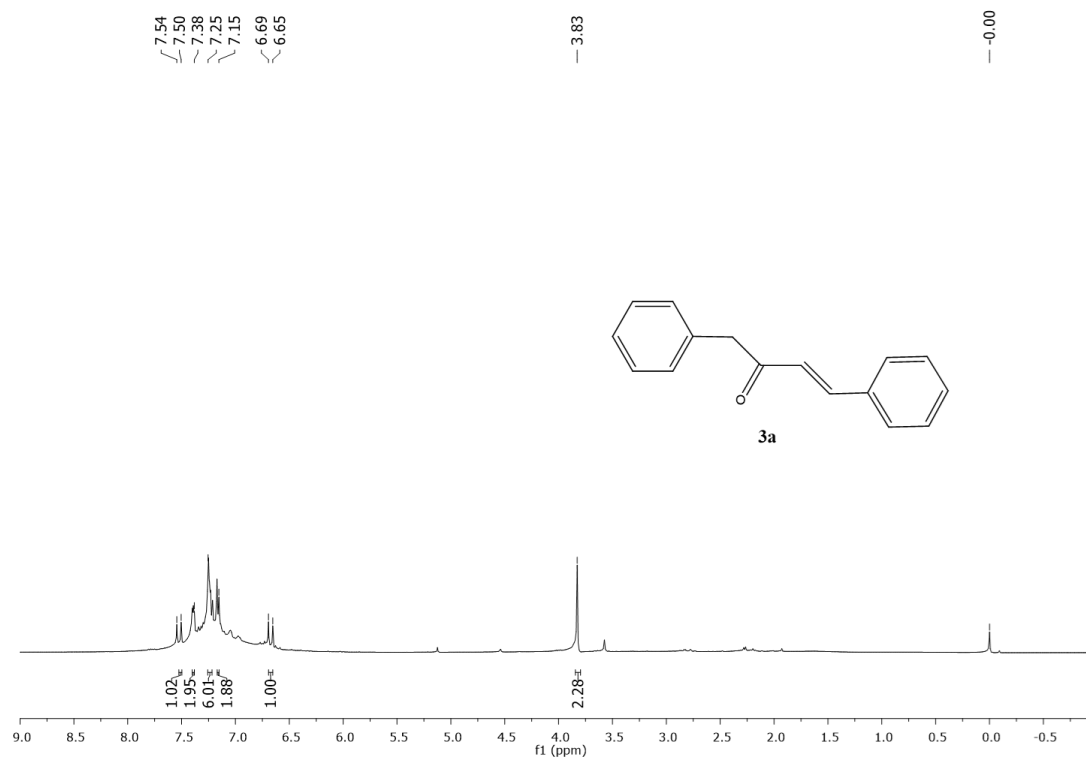

**Figure S9.** <sup>1</sup>H NMR spectrum of **3a** (400 MHz, CDCl<sub>3</sub>)

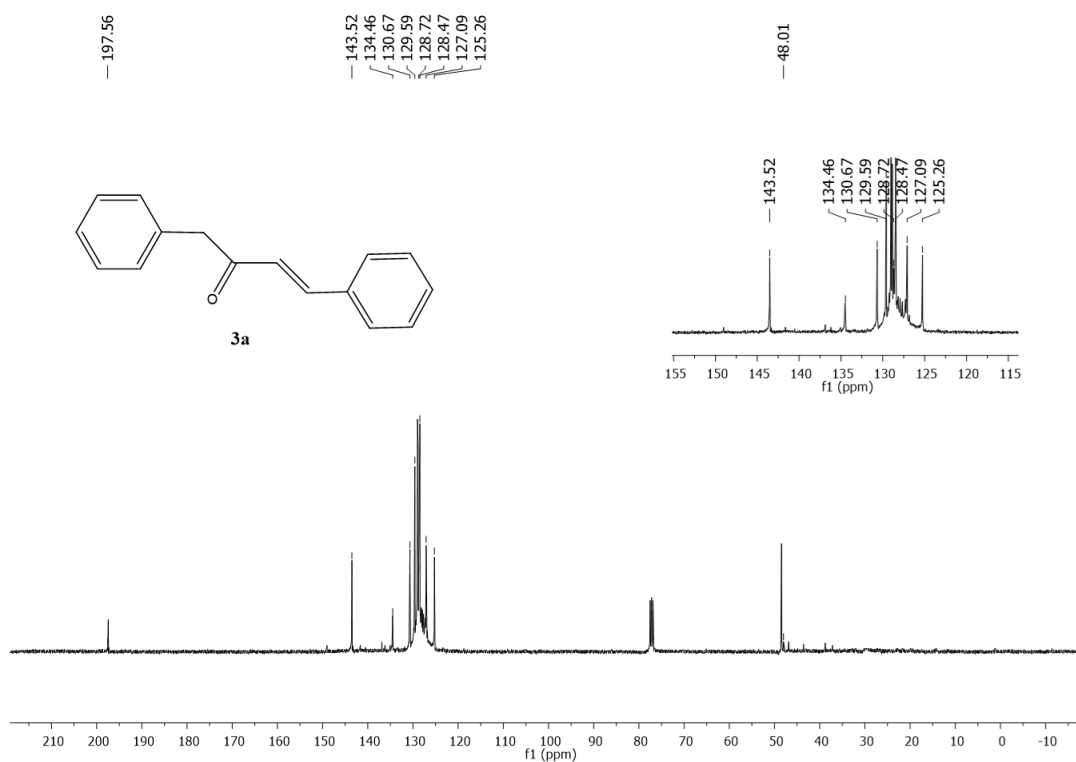

**Figure S10.** <sup>13</sup>C NMR spectrum of **3a** (100 MHz, CDCl<sub>3</sub>)



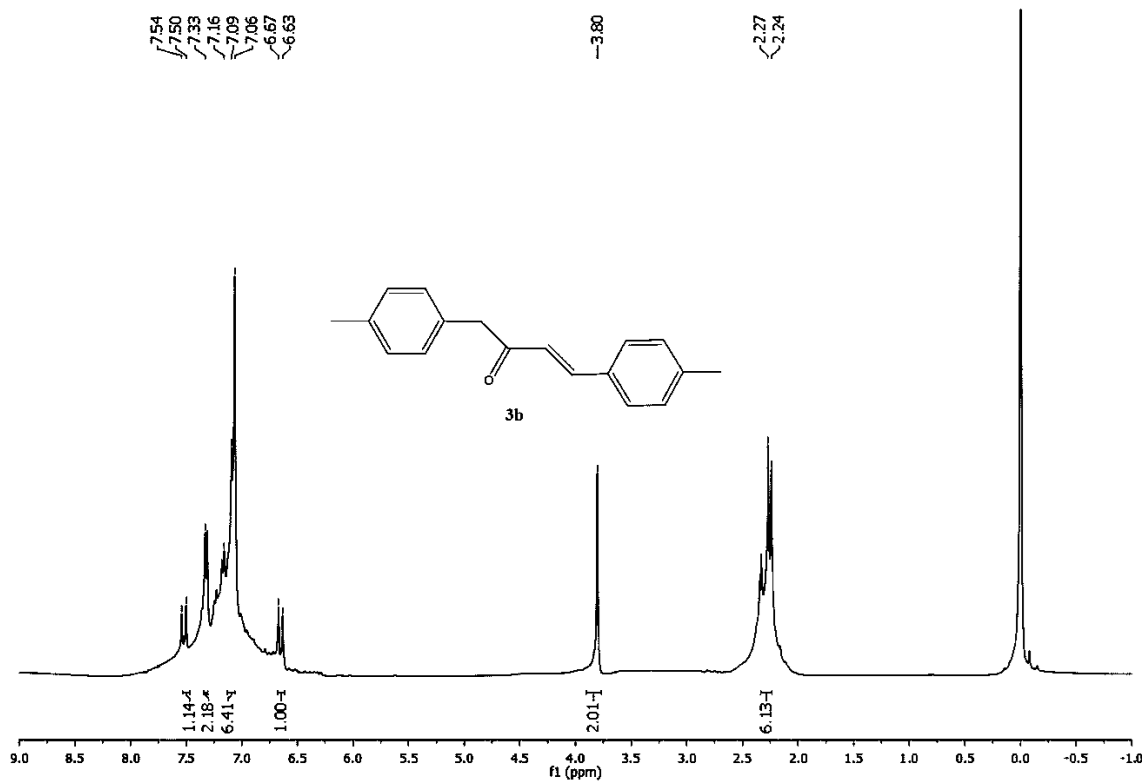

Figure S11. <sup>1</sup>H NMR spectrum of 3b (400 MHz, CDCl<sub>3</sub>)

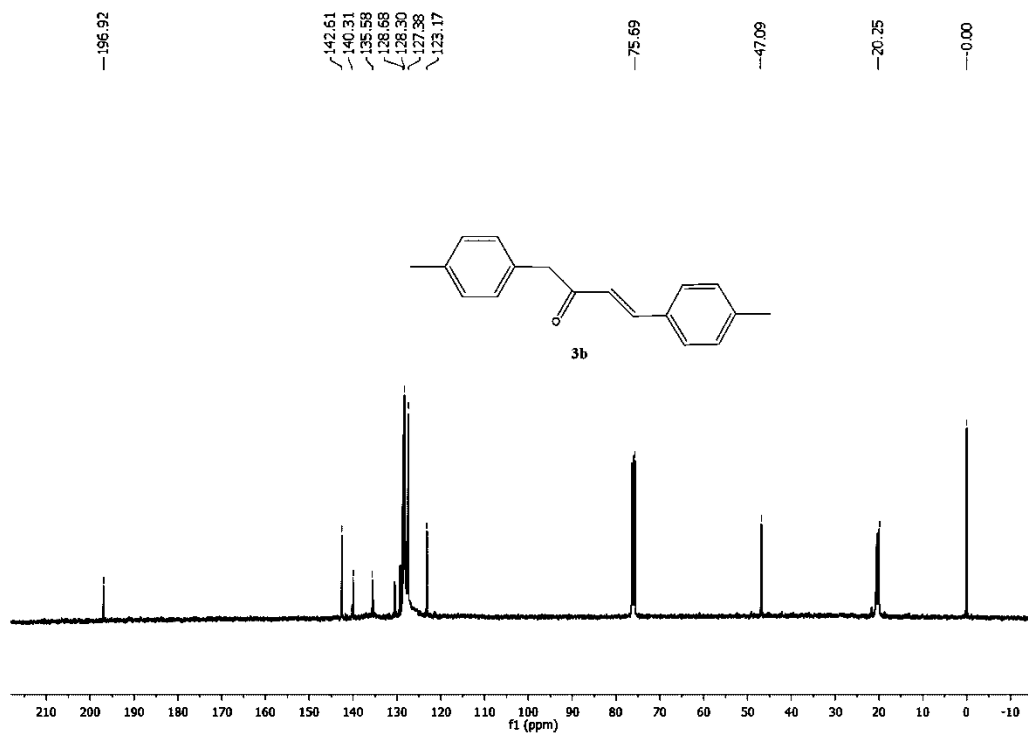

Figure S12. <sup>13</sup>C NMR spectrum of 3b (400 MHz, CDCl<sub>3</sub>)

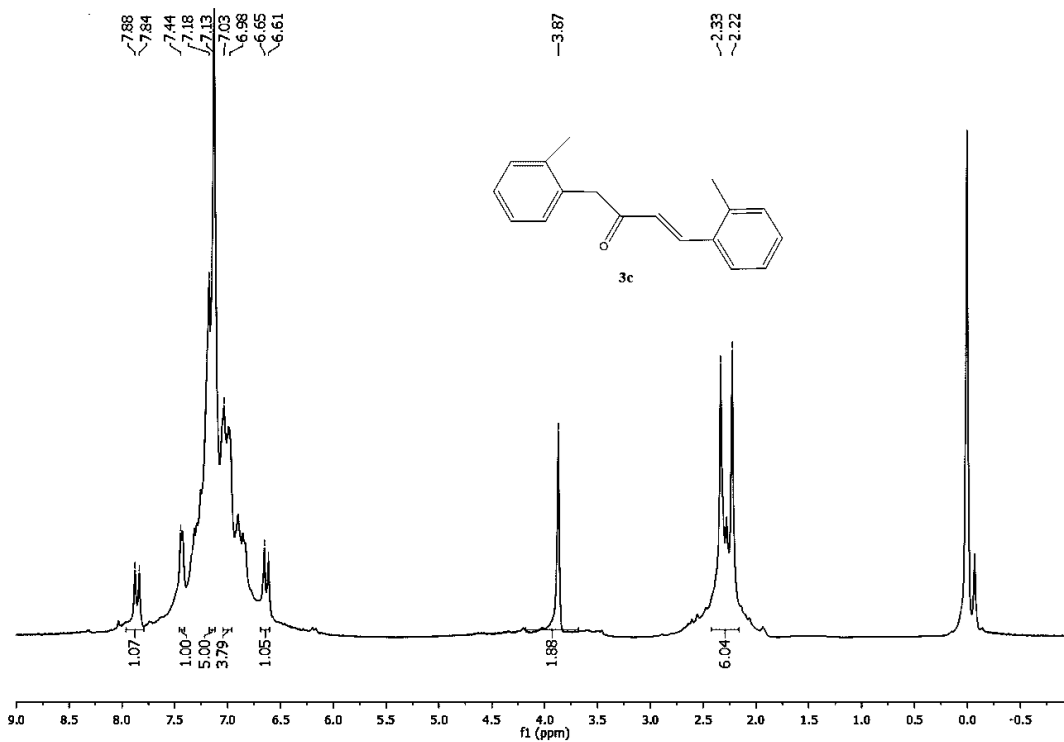

Figure S13. <sup>1</sup>H NMR spectrum of 3c (400 MHz, CDCl<sub>3</sub>)

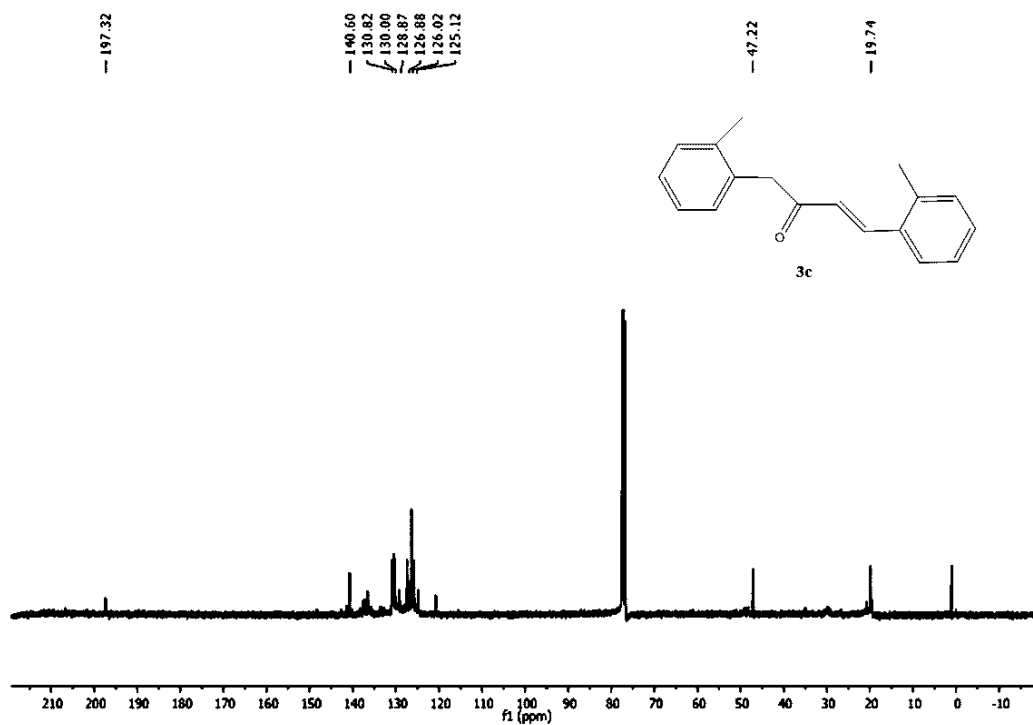

Figure S14. <sup>13</sup>C NMR spectrum of 3c (400 MHz, CDCl<sub>3</sub>)

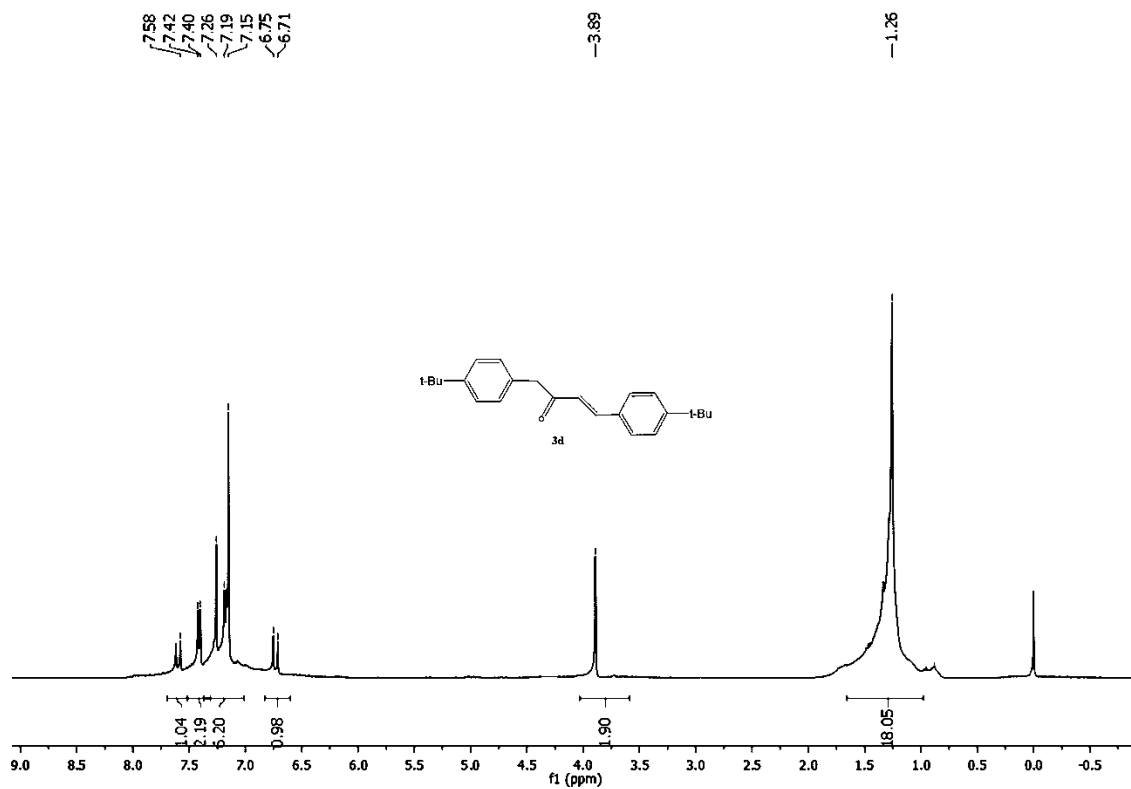

Figure S15. <sup>1</sup>H NMR spectrum of 3d (400 MHz, CDCl<sub>3</sub>)

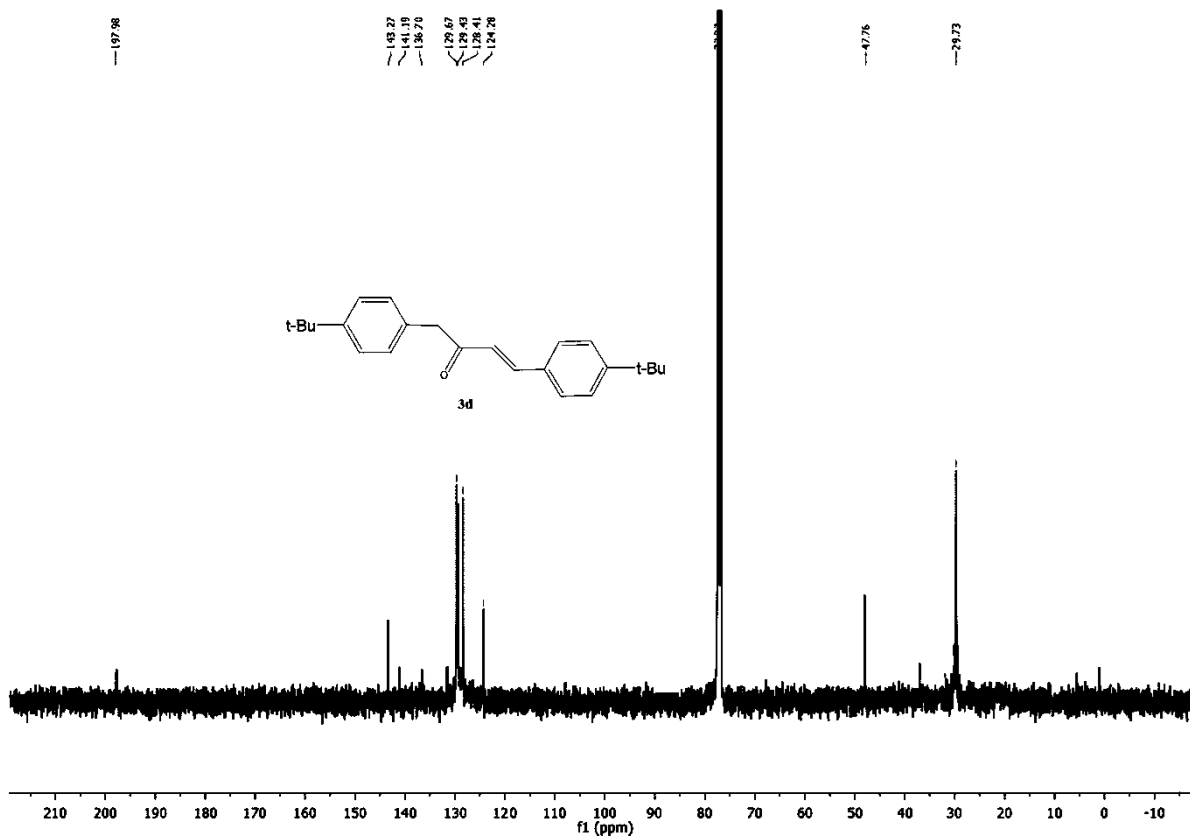

Figure S16. <sup>13</sup>C NMR spectrum of 3d (400 MHz, CDCl<sub>3</sub>)
